# Supplementary material for: Controlled synthesis of one-dimensional BiOBr with exposed (110) facets and enhanced photocatalytic activity
Source: Royal Society of Chemistry journal article supplement (doi:10.1039/c7ce01452j), 2017-01-01
Supplement: c7ce01452j1.pdf [file c7ce01452j1.pdf]

## **Controlled synthesis of one-dimensional BiOBr with exposed (110) facet and enhanced photocatalytic activities**

**Yin Peng\*, Jian Xu, Ting Liu, Yan-ge Mao**

The Key Laboratory of Functional Molecular Solids, Ministry of Education, College of Chemistry and Materials Science, Anhui Normal University, Wuhu 241000, China

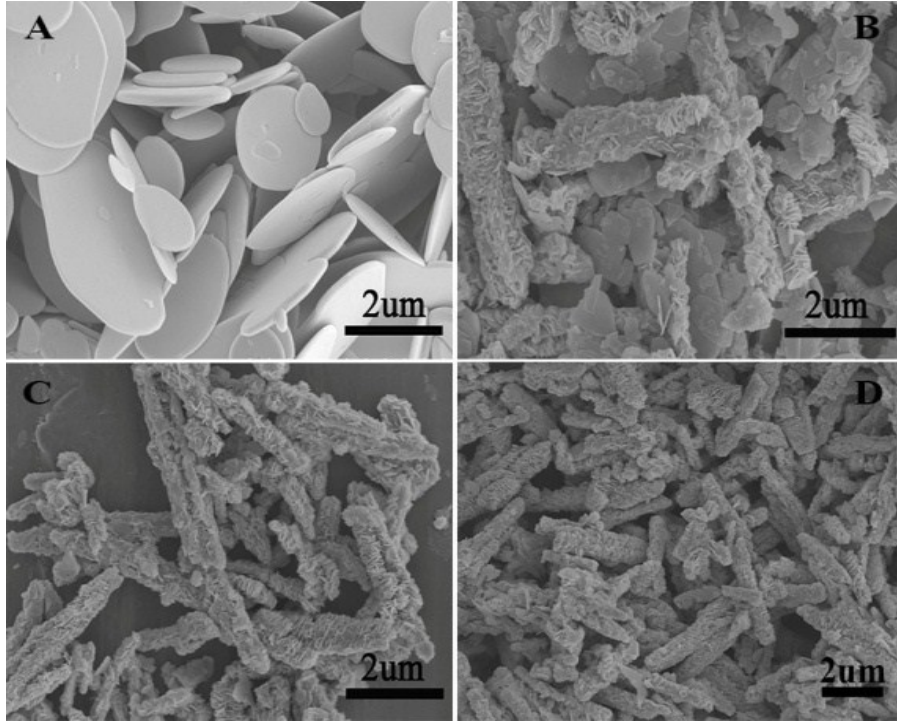

**Fig. S1** SEM images of the obtained BiOBr with the different concentration of glucose, (A) 0 g, (B) 0.002 g, (C) 0.004 g and (D) 0.006 g.

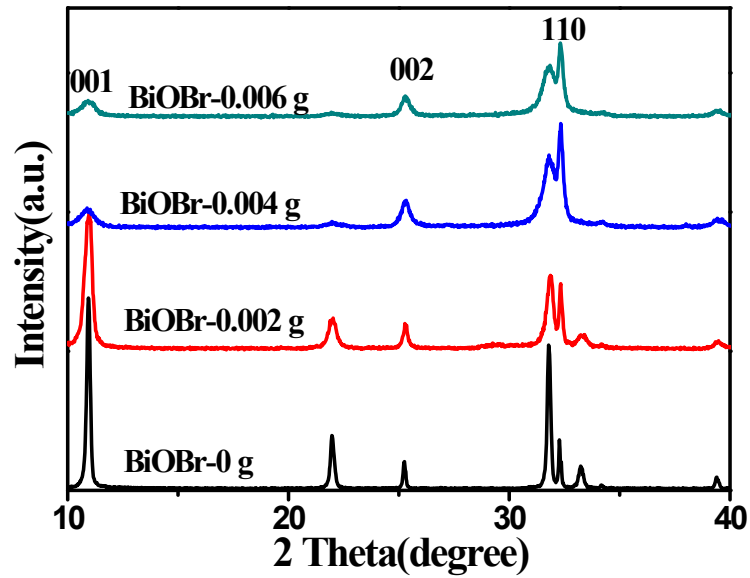

**Fig. S2** The XRD patterns of the obtained BiOBr samples with different concentration of glucose (0, 0.002, 0.004 and 0.006g).

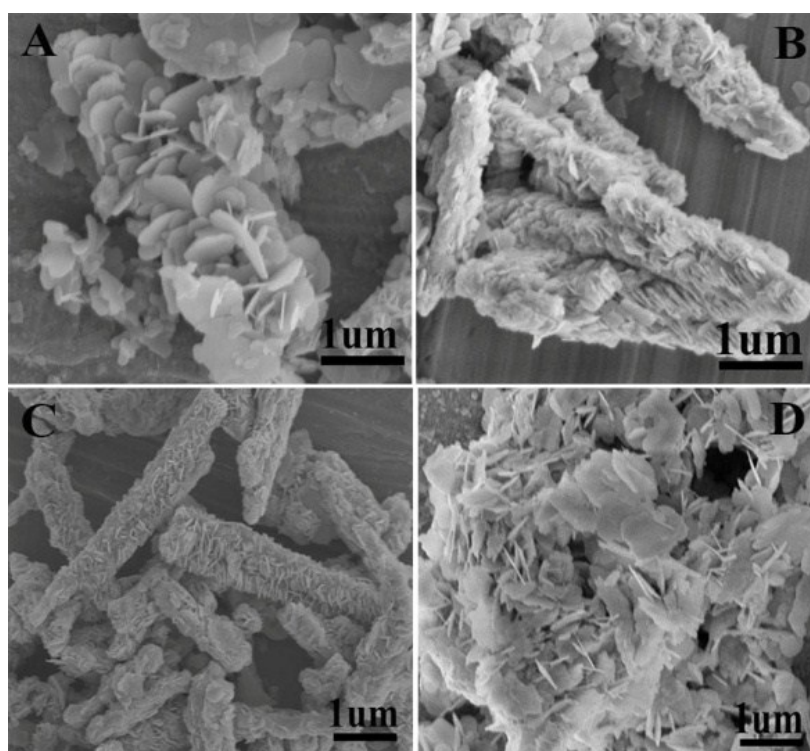

**Fig. S3** SEM images of BiOBr at 160° C for different reaction time using 0.004g of glucose as surfactant, (A) 2 h, (b) 6 h, (c) 12 h, (d) 24 h.

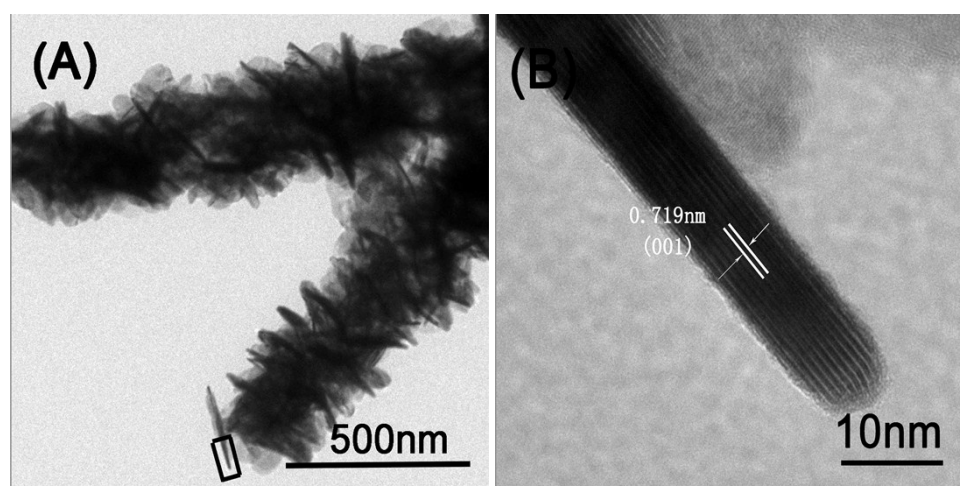

**Fig.S4** the TEM and HRTEM images of BiOCl-110 sample.

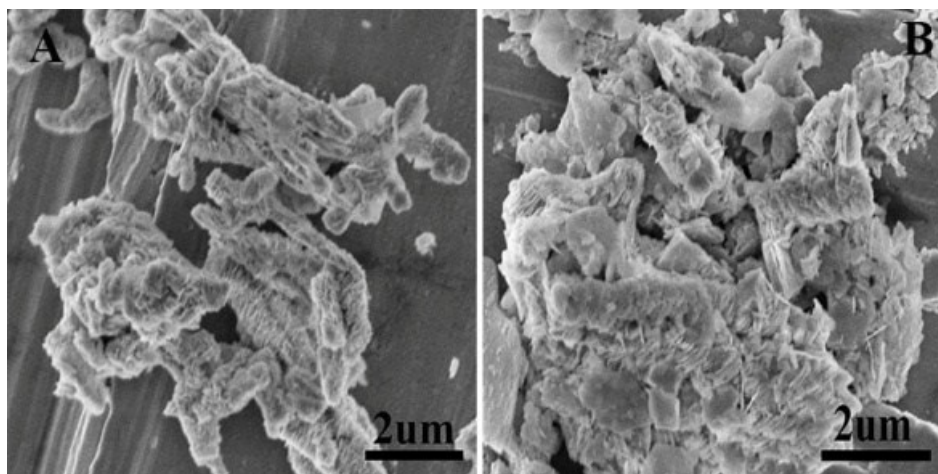

**Fig. S5** SEM images of BiOBr-110 obtained at different concentration of reactants (A) 0.5 mmol, and (B) 2 mmol.

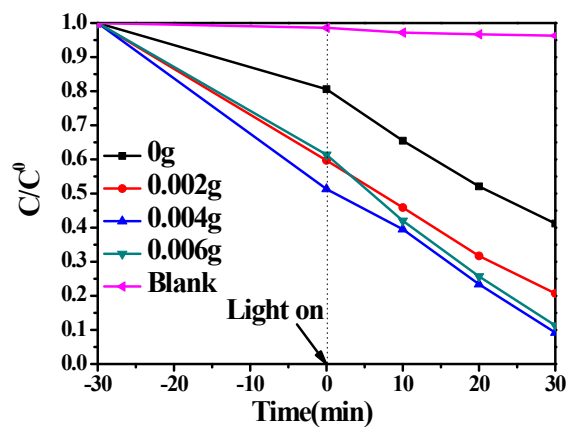

**Fig. S6** the degradation curve of MO using BiOBr samples obtained at different concentration of glucose as photocatalyst under visible light irradiation.

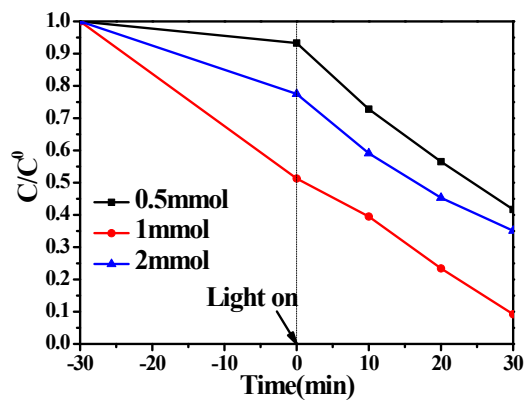

**Fig. S7** the degradation curve of MO using BiOBr samples obtained at different concentration of reactant as photocatalysts under visible light irradiation

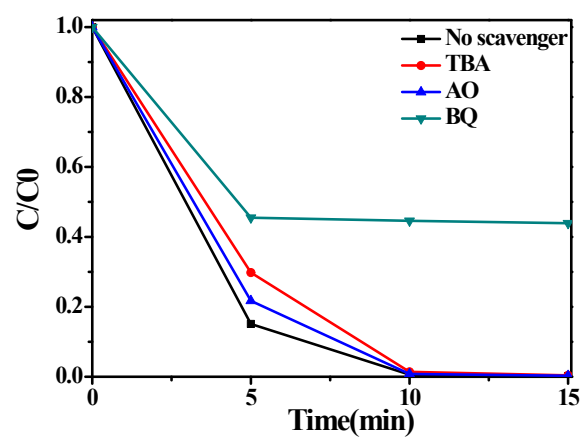

**Fig. S8** Active species trapping experiments during the photocatalytic degradation to MO (20 mg/L) under solar light irradiation using BiOBr-110 as photocatalyst.
